# Supplementary material for: Genomic Diversity in Two Related Plant Species with and without Sex Chromosomes - Silene latifolia and S. vulgaris
Source: PubMed Central journal article supplement (PMC3290532; doi:10.1371/journal.pone.0031898), 2012-02-29
Supplement: pone.0031898.s005.pdf [file pone.0031898.s005.pdf]

**Table S1.** Proportions of individual elements in the genomes of *S. latifolia* and *S. vulgaris* (\* data from Cermak et al. [28]).

| Type of element                | Total number of clones containing respective elements |                          |                   |                             |             |              |                           |                          |                             |             |              |
|--------------------------------|-------------------------------------------------------|--------------------------|-------------------|-----------------------------|-------------|--------------|---------------------------|--------------------------|-----------------------------|-------------|--------------|
|                                | <i>Silene vulgaris</i>                                |                          |                   |                             |             |              | <i>Silene latifolia</i> * |                          |                             |             |              |
|                                | Number of clones                                      | Proportion of clones (%) | Element size (kb) | Number of clones per genome | kb          | % of genome  | Number of clones          | Proportion of clones (%) | Number of clones per genome | kb          | % of genome  |
| <b>Retroelements</b>           | 127                                                   | 41                       |                   |                             |             | 22.9%        | 232                       | 62,3                     |                             |             | 36.4%        |
| <b>LTR</b>                     | 125                                                   | 40,4                     |                   |                             |             | 22.8%        | 223                       | 59,9                     |                             |             | 36.1%        |
| <b>Gypsy</b>                   | <b>58</b>                                             | <b>18,8</b>              |                   |                             |             | <b>12.7%</b> | <b>179</b>                | <b>48,1</b>              |                             |             | <b>32.5%</b> |
| Athila                         | 3                                                     | 1                        | 7                 | 714                         | 4998        | 0.5%         | 32                        | 8,6                      | 10000                       | 70000       | 2.7%         |
| Ogre                           | 0                                                     | 0                        | 24                | 0                           | 0           | 0            | 80                        | 21,5                     | 25000                       | 600000      | 22.7%        |
| Peabody                        | 8                                                     | 2,6                      | 6,5               | 1904                        | 12376       | 1.1%         | 36                        | 9,7                      | 11250                       | 73125       | 2.8%         |
| Retand                         | 47                                                    | 15,2                     | 11                | 11190                       | 123090      | 11.2%        | 31                        | 8,3                      | 9687                        | 106562      | 4%           |
| <b>Copia</b>                   | 67                                                    | 21,6                     | 7                 | 15952                       | 111664      | <b>10.1%</b> | 44                        | 11,8                     | 13750                       | 96250       | 3.6%         |
| <b>Non - LTR</b>               | <b>2</b>                                              | <b>0,6</b>               |                   |                             |             | <b>0.1%</b>  | <b>9</b>                  | <b>2,4</b>               |                             |             | <b>0.3%</b>  |
| SINE                           | 0                                                     | 0                        | 0,5               | 0                           | 0           | 0            | 0                         | 0                        | 0                           | 0           | 0            |
| LINE                           | 2                                                     | 0,6                      | 2,5               | 476                         | 1190        | 0.1%         | 9                         | 2,4                      | 2812                        | 7031        | 0.3%         |
| <b>DNA transposons</b>         | <b>6</b>                                              | <b>1,9</b>               | <b>4</b>          | <b>1428</b>                 | <b>5117</b> | <b>0.6%</b>  | <b>3</b>                  | <b>0,8</b>               | <b>938</b>                  | <b>4532</b> | <b>0.2</b>   |
| DNA/EnSpm                      | 2                                                     |                          | 6                 | 476                         | 2856        | 0.3%         | 2                         |                          | 625                         | 3750        | 0.1%         |
| DNA/hAT                        | 1                                                     |                          | 3                 | 238                         | 714         | 0.1%         | 0                         |                          | 0                           | 0           | 0            |
| DNA/MuDR                       | 1                                                     |                          | 2,5               | 238                         | 595         | 0.1%         | 1                         |                          | 313                         | 782         | 0.1%         |
| DNA/P                          | 2                                                     |                          | 2                 | 476                         | 952         | 0.1%         | 0                         |                          | 0                           | 0           | 0            |
| <b>Tandem repeats</b>          | <b>177</b>                                            | <b>57,1</b>              |                   |                             |             | <b>0.3%</b>  | <b>137</b>                | <b>36,9</b>              |                             |             | <b>0.6%</b>  |
| Tandem repeat STAR             | 118                                                   | 38,1                     | 0,043             | 28095                       | 1208        | 0.1%         | 29                        | 7,8                      | 9063                        | 389         | 0.02%        |
| Tandem repeat X.43.1           | 19                                                    | 6                        | 0,312             | 4523                        | 1411        | 0.12%        | 101                       | 27,2                     | 31563                       | 9847        | 0.37%        |
| TR1                            | 40                                                    | 12,9                     | 0,074             | 9523                        | 704         | 0.06%        | 7                         | 1,9                      | 2188                        | 161         | 0.01%        |
| <b>All Repetitive elements</b> | <b>310</b>                                            | <b>100</b>               |                   |                             |             | <b>23.4%</b> | <b>372</b>                | <b>100</b>               |                             |             | <b>36.8%</b> |
