# Supplementary material for: Genomic Diversity in Two Related Plant Species with and without Sex Chromosomes - Silene latifolia and S. vulgaris
Source: PubMed Central journal article supplement (PMC3290532; doi:10.1371/journal.pone.0031898), 2012-02-29
Supplement: pone.0031898.s007.pdf [file pone.0031898.s007.pdf]

**Table S3.** Percentage of specific microsatellites in BAC clones containing the *SIAP3* and *SI4* genes in *S. latifolia* and *S. vulgaris*. Satellite units were selected based on data by Kubat *et al.* [20] showing accumulation of several microsatellites on Y chromosome of *S. latifolia*.

| Dinucleotide |        |        |       |      |      |      |
|--------------|--------|--------|-------|------|------|------|
| Unit         | SIAP3Y | SIAP3X | SvAP3 | SIY4 | SIX4 | Sv4  |
| CA           | 3.84   | 2.41   | 3.65  | 4.30 | 3.67 | 3.56 |
| GA           | 4.25   | 4.49   | 4.74  | 3.31 | 4.34 | 4.67 |
| GC           | 0.24   | 0.56   | 0.27  | 0.56 | 0.00 | 0.14 |

| Trinucleotide |        |        |       |      |      |      |
|---------------|--------|--------|-------|------|------|------|
| Unit          | SIAP3Y | SIAP3X | SvAP3 | SIY4 | SIX4 | Sv4  |
| CAA           | 0.55   | 0.51   | 0.36  | 0.35 | 0.22 | 0.43 |
| CAG           | 0.17   | 0.28   | 0.27  | 0.07 | 0.11 | 0.05 |
| GAA           | 0.28   | 0.34   | 0.27  | 0.85 | 0.33 | 0.34 |
| TAA           | 0.41   | 0.67   | 1.09  | 0.71 | 0.78 | 0.77 |
