# Supplementary material for: Genomic Diversity in Two Related Plant Species with and without Sex Chromosomes - Silene latifolia and S. vulgaris
Source: PubMed Central journal article supplement (PMC3290532; doi:10.1371/journal.pone.0031898), 2012-02-29
Supplement: pone.0031898.s008.pdf [file pone.0031898.s008.pdf]

**Table S4 .** BAC sequencing and assembly statistics.

| <b>BAC Name</b> | <b>Gene name</b> | <b>Number of Reads</b> | <b>Number of Bases</b> | <b>Number of Assembled Reads</b> | <b>Large Contig/Scaffold Number (&gt;1 kb)</b> | <b>Average Large Contig/Scaffold Size</b> | <b>Percent Assembled (%)</b> |
|-----------------|------------------|------------------------|------------------------|----------------------------------|------------------------------------------------|-------------------------------------------|------------------------------|
| <b>65P13</b>    | <b>SIX4</b>      | 200537                 | 38443944               | 170587                           | 3                                              | 22463                                     | 0.85                         |
| <b>93L17</b>    | <b>SIY4</b>      | 1154                   | 1575745                | 932                              | 23                                             | 6222                                      | 0.81                         |
| <b>62M2</b>     | <b>Sv4</b>       | 69648                  | 16725302               | 63674                            | 30                                             | 6921                                      | 0.91                         |
| <b>251L13</b>   | <b>SIAP3X</b>    | 6275                   | 2056538                | 5797                             | 56                                             | 3180                                      | 0.92                         |
| <b>30L22</b>    | <b>SIAP3Y</b>    | 82974                  | 20293397               | 72221                            | 39                                             | 7023                                      | 0.87                         |
| <b>91M20</b>    | <b>SvAP3</b>     | 23398                  | 5800501                | 21206                            | 6                                              | 18284                                     | 0.91                         |
